# Supplementary material for: Psycho-Educational and Rehabilitative Intervention to Manage Cancer Cachexia (PRICC) for Advanced Patients and Their Caregivers: Lessons Learned from a Single-Arm Feasibility Trial
Source: Cancers (Basel). 2023 Mar 30;15(7):2063. doi: 10.3390/cancers15072063 (PMC10093308; doi:10.3390/cancers15072063)
Supplement: Supplementary file 1 [file cancers-15-02063-s001.zip › File S2.pdf]

## **File S2: QUESTIONS FOR DYADS AND HEALTHCARE PROFESSIONALS**

### **STUDY: Psycho-educational and rehabilitative intervention to manage cancer cachexia (PRICC) for patients and their caregivers**

#### **1. Questions addressed to the patient-caregiver dyad:**

- a) Can you tell us how it went when you were asked to participate in the research project?
- b) How was the project explained to you? From who?
- c) Have you had the opportunity to talk about this proposal together? Have you talked to anyone about it?
- d) What did you think about participation/non-participation? What thoughts have you had? How did you feel?

#### **Questions related to the psycho-educational intervention:**

- a) Can you tell me how the meetings with the nurses went? What did she offer you?
- b) What favoured the path that has been proposed to you? (Investigate in particular the times, methods, and places, if they were adequate, if they were supportive)
- c) What hindered the path that was proposed to you?
- d) Do you have any suggestions to help us improve this intervention?

#### **Questions related to the rehabilitation intervention:**

- a) Can you tell me how the physiotherapy sessions in the hospital went? What did they offer you?
- b) What did they tell you?
- c) Can you tell me how the physiotherapy sessions at home went?

**In your experience, did the two interventions integrate well into the path that was offered to you?**

#### **2. Questions addressed to nurses and physiotherapists who participated in the study**

- a) Can you tell us how your participation in the study went?
- b) What favoured your intervention?
- c) What hindered your intervention?
- d) Do you have any suggestions to help us improve this intervention?

**In your experience, have the two interventions integrated well into the pathway offered to patients and family members?**
